# Supplementary material for: Unraveling the Chloroplast Genomes of Two Prosopis Species to Identify Its Genomic Information, Comparative Analyses and Phylogenetic Relationship
Source: Int J Mol Sci. 2020 May 6;21(9):3280. doi: 10.3390/ijms21093280 (PMC7247323; doi:10.3390/ijms21093280)
Supplement: Supplementary file 1 [file ijms-21-03280-s001.xls]

## Sheet: MatrixOutput
Table S1. Average pairwise distance of plastid sequences from P. juliflora with related species (P. cineraria, P. glandulosa, P. javanica and A. microsperma)
	P. juliflora	P. cineraria	P. glandulosa	P. javanica	A. microsperma
P. juliflora
P. cineraria	0.00106917
P. glandulosa	0.00092737	0.000733923
P. javanica	0.0145719	0.0144588	0.0138447
A. microsperma	0.0251681	0.0250457	0.0244491	0.0236415

## Sheet: Caption
Table. Estimates of Evolutionary Divergence between Sequences
The number of base substitutions per site from between sequences are shown. Analyses were conducted using the Tamura 3-parameter model [1]. The rate variation among sites was modeled with a gamma distribution (shape parameter = 1). This analysis involved
1. Tamura K. (1992). Estimation of the number of nucleotide substitutions when there are strong transition-transversion and G + C-content biases. Molecular Biology and Evolution 9:678-687.
2. Kumar S., Stecher G., Li M., Knyaz C., and Tamura K. (2018). MEGA X: Molecular Evolutionary Genetics Analysis across computing platforms. Molecular Biology and Evolution 35:1547-1549.
Disclaimer: Although utmost care has been taken to ensure the correctness of the caption, the caption text is provided "as is" without any warranty of any kind. Authors advise the user to carefully check the caption prior to its use for any purpose and re
